# Supplementary material for: GSK-3β–Regulated N-Acetyltransferase 10 Is Involved in Colorectal Cancer Invasion
Source: Oxford University Press journal article supplement (doi:10.1158/1078-0432.ccr-13-3477), 2014-07-01
Supplement: 10780432ccr133477-sup-124882_2_supp_2513566_n708rz.doc [file 10780432ccr133477-sup-124882_2_supp_2513566_n708rz.doc]

**Antibodies**

The rabbit polyclonal antibody against the N-terminus of human NAT10 was used as previously described (17). Mouse monoclonal antibody specific to β-catenin (clone 14, BD) was purchased from Transduction Laboratories (Franklin Lake, NJ), E-cadherin rabbit monoclonal antibody (clone EP700Y) and GSK-3β rabbit monoclonal antibody (Y174) from Abcam (Cambridge, UK), and anti-acetyl-tubulin was from Sigma Aldrich (St Louis, MO, USA), P120 mouse monoclonal antibody from (Zeta, USA), respectively.

**Immunohistochemistry (IHC)**

Formalin-fixed, paraffin-embedded sections were deparaffinnized by series treatments of xylene and hydrated in graded alcohols. Endogenous peroxidase activity was quenched by 0.3% hydrogen peroxide for 60 min. The antigen retrieval was carried out by heating at 95°C in citrate buffer (20mM citrate buffer, pH6.0) for 20 min. After blocked with horse serum (1:100 in PBS), the sections were incubated with primary antibodies in various dilutions overnight at 4°C. With incubation of Dako Envision Flex amplification kit (Dako, Glostrup, Denmark) for 60 min, color development was completed with freshly prepared diaminobenzidine solution (Dako). Sections were then counterstained with Mayer’s haematoxylin. For negative control, the primary antibody was replaced by PBS or normal rabbit serum.

**PCR and sequencing**

The primers for amplification of NAT10 exons were designed according to the deposited sequence (GenBank accession no. 55226). Genomic DNA was isolated from HCT116, Lovo cells and 20 cases of paraffin-embedded CRCs by DNA isolation kit (Qiagen, Germany) according to the manufacture’s protocol (Qiagen, Germany). 100 ng of total DNA was mixed with 2 μl of 10 μM primers, 1 μl of 4 mM dNTPs, 5 μl of 10×PCR buffer and 1μl of Taq DNA polymerase to a final volume of 50 μl. After initially at 95 °C for 1min, amplification was performed for 30 cycles of 94 °C for 40 s, 55 °C for 40 s, 72 °C for 40 s and finally at 72 °C for 5 min. The amplified products were sequenced by using 3500 Genetic Analyzer (Applied Biosystems, USA).

**Western blotting**

Total cell lysates were obtained by incubating the cells in lysis buffer [1% Triton X-100, 0.5% sodium deoxycholate, 0.2% SDS, 150 mM NaCl, 2 mM EDTA, 10 mM Hepes (pH 7.4), 20 mM NaF, 1 mM orthovanadate and a protease inhibitor cocktail (1:100 dilution)], for 30 min at 4˚C. After centrifugation at 10,000 x g for 10 min at 4˚C, the supernatant was collected and stored at -20˚C for subsequent analysis. For cell fractions, the cytoplasmic and nuclear proteins were extracted using nuclear and cytopasmic protein extraction kit (Sangon Biotech Cor, Shanghai, China), respectively. Equal amounts of cell proteins (20-40 μg/lane) were separated by SDS-PAGE in 10% gels and transferred to PVDF membranes (Millipore, Billerica, MA, USA) using a semi-dry transfer cell (Bio-Rad) at 25V for 60 min. Membranes were then blocked for 1 h with TBS-T (20 mM Tris-HCl pH 7.6, 137 mM NaCl and 0.1% Tween-20) containing 5% nonfat dry milk (Cell Signaling Technology, Beverly, MA, USA) or with 1% BSA (Sigma) and incubated overnight with primary antibodies. After washing, membranes were incubated for 1 h with peroxidase-conjugated goat anti-rabbit IgG or peroxidase-conjugated goat anti-mouse IgG. Proteins were visualized using an enhanced chemiluminescence kit (Bio-Rad). Band images of three independent experiments were quantified by optical density using the Lab-Works 4.6 software (Bio-Rad). β-actin was used as internal control for each protein. The antibodies were used including anti-NAT10 (1:5000), anti-β-actin (1:5000), anti-β-catenin (1:2000), anti-acetylated-tubulin (1:500) and anti-P120 (1:500), anti- GSK-3β (1:5000).

**Flow cytometry**

1х106 of cells were collected after treatment of LiCl (10 mM) and SB415286 (20 µM) for 60h. After washed with cold PBS, the cells were blocked in PBS containing 1% horse serum for 60 min at room temperature. Then cells were incubated with anti-NAT10 antibody diluted in the blocking buffer overnight, following with being washed in PBS for two times the next day. Subsequently, cells were incubated with FITC-conjugated goat anti-rabbit secondary antibody for 60min. After twice of wash in PBS, cells were filtered and re-suspended and applied to flowcytometry using the Cell Quest software package (Becton–Dickinson FACScalibur, USA). Controls were used with either of normal rabbit serum or PBS instead of rabbit anti-NAT10 antibody.

**Luciferase reporter assay**

The used luciferase reporters of the promoter of NAT10 were constructed in previously described (17). For luciferase reporter assays, the reporter plasmids were transiently cotransfected into HeLa or Lovo cells with pRL-SV-Renilla reference vector (Promega) using Lipofectamine 2000 reagent (Invitrogen) according to the manufacturer’s instructions. LiCl was added to cells 24h later, and protein lysates were prepared after 48 h of transfection and luciferase activities were measured by the Dual-Glo Luciferase Reporter Assay System (Promega) using a MicroBeta TriLux Liquid Scintillation and Luminescence Counter (Perkin-Elmer, Waltham, MA, USA). In some experiments, β-catenin was co-transfected with above reporters and analyzed. Firefly luciferase activities were normalized to Renilla luciferase activities which were served as internal controls and presented as a ratio (relative luciferase activity). The mean values (±SE) from three independent experiments are shown. Each experiment was performed in duplicate for at least 3 times (N=6).

**Cell migration and invasion assay**

Transwell assay was assessed using 8-μm inserts (BD Biosciences). A total of 1х105 cells were suspended in 200 μl serum-free DMEM media and loaded into upper chambers, while lower wells were filled with 600 μl of complete medium (DMEM supplemented with 10% FBS). For invasion assay, each insert was coated with 1 mg/ml Matrigel and incubated at 37℃ for 1h. A total of 1х105 cells were suspended in 100 ml serum-free DMEM media and loaded into coated inserts, and lower chambers were filled with the complete medium. Migration and invasion chambers were incubated in a humidified 5% CO2 incubator at 37℃ for 12h and 24h respectively. Cells were then fixed with 600μl of 4% formalin for 15 min at r. t. The inner surface of the upper chambers was wiped using cotton swabs to remove non-migrated cells in the migration assay or scrapes of Matrigel in invasion assay. The chambers were then washed with PBS and stained with 600 μl 0.1% crystal violet for 15 min at r. t. After PBS washing, the membranes were removed onto slides. Stained cells were counted in 5 random fields at 200х magnification, and recorded by photography.

**Intravenous mouse xenograft studies**

For inoculation, sub-confluent cells were harvested and washed in phosphate buffered saline (PBS) just prior to implantation. Six-week-old male BALB/c nude(nu/nu) mice (maintained in Experimental Animal Center of Health Science Center of Peking University) were injected via tail vein with 2×106 cells/per mouse (in 100 μl PBS), and each of groups contained 6 mice. After 4 weeks, mice were sacrificed and the lungs were inspected for metastasis by either macro- or microscopy. For microscopic evaluation, whole lungs were embedded and continually sectioned, and the metastatic foci were confirmed by H&E staining and counted, respectively.
